# Supplementary material
Source: MDPI journal article supplement (https://www.mdpi.com/2073-4441/15/8/1565)
Supplement: s1 [file s1]

# Supplemental Materials

**Table S1.** The reported screening and sorting methods of priority pollutants.

| Country        | Screening Purposes                                                           | Evaluation Indicators                                                                                                   | Evaluation Methodology                                               | References                                           |
|----------------|------------------------------------------------------------------------------|-------------------------------------------------------------------------------------------------------------------------|----------------------------------------------------------------------|------------------------------------------------------|
| United States  | Screening of priority pollutants in water environment                        | Production, detection rate, acute toxicity, chronic toxicity, environmental and biological effects of toxicity          | Expert assessment                                                    | US EPA,1986 [34]; SWANSON M B.,1997 [35]             |
|                | Comprehensive Environmental Response, Compensation and Liability Act, CERCLA | Occurrence frequency in national priority list, toxicity, potential exposure hazards                                    | Hierarchical assignment, weighting and sum comprehensive calculation |                                                      |
| European Union | Combined monitoring-based and modeling-based priority setting scheme, COMMPS | Concentration, exposed quantity, effect evaluation.                                                                     | COMMPS evaluation tool                                               | Sousa, J.C., 2018 [36]; Shang bo Zhou, 2019 [19]     |
| Canada         | Screening of environmental pollutants                                        | Pollutant emission characteristics, exposed quantity, effect evaluation, risk assessment                                | Expert assessment                                                    | Dunn A M.2009 [37]                                   |
| Netherlands    | Priority screening of organic pollutants                                     | Pollutant emission, physicochemical property, bioaccumulation, Pollutant destination, toxicity                          | Uniform system for the evaluation of substances, USES 1.0            | GUINEE J B, et al., 1996 [38]                        |
| Australia      | National pollutant inventory, NPI                                            | Human health, environmental effect, exposure quantity                                                                   | Hierarchical assignment, weighting and sum comprehensive calculation | National Pollutant Inventory Review Report 2021 [39] |
| Japan          | Environmental priority monitoring substances                                 | Human health, exposed quantity in working place, exposed factors in working place, general population exposure factors. | Hases graphic method                                                 | Wang Y Z. 2018 [33]                                  |

|             |                                                                                          |                                                                                                       |                                                                                |                               |
|-------------|------------------------------------------------------------------------------------------|-------------------------------------------------------------------------------------------------------|--------------------------------------------------------------------------------|-------------------------------|
| Germany     | Chemical priority pollutant                                                              | Exposed quantity, toxicity, ecotoxicity                                                               | Classification score                                                           |                               |
| England, UK | UK Chemicals Stakeholder Forum, UKCSF; Royal Commission on Environmental Pollution, RCEP | Persistence, bioenrichment, toxicity;<br>List, sort, evaluate, act                                    | The persistence, bioenrichment and toxicity (PBT)assessment; Expert assessment | David Spurgeon, 2022 [40]     |
| Norway      | Environmental chemistry priority pollutant                                               | Toxicity, bioenrichment                                                                               | Refer to the European Union                                                    | Wang Y Z. 2018 [33]           |
| Sweden      | Environmental chemistry priority pollutant                                               | Refer to the European Union                                                                           |                                                                                |                               |
| South Korea | Priority substances list, PSL                                                            | Emission sources, the amount of emissions, transfer volume, chemical characteristics, discharge value |                                                                                | Naree Park, et al., 2018 [41] |

**Table S2.** Tested category.

| Category                              | Number of Tests | Tests (Index)                                                                                                                                                                                                                                                                                                                                                                                                                                                                                                                                                                                                       |
|---------------------------------------|-----------------|---------------------------------------------------------------------------------------------------------------------------------------------------------------------------------------------------------------------------------------------------------------------------------------------------------------------------------------------------------------------------------------------------------------------------------------------------------------------------------------------------------------------------------------------------------------------------------------------------------------------|
| In situ indicators                    | 8               | Temp, pH, ORP, Spcond, Salinity, Turb, DO, TDS                                                                                                                                                                                                                                                                                                                                                                                                                                                                                                                                                                      |
| Regular test                          | 46              | Na <sup>+</sup> , K <sup>+</sup> , Ca <sup>2+</sup> , Mg <sup>2+</sup> , Al <sup>3+</sup> , Fe, HCO <sub>3</sub> <sup>-</sup> , CO <sub>3</sub> <sup>2-</sup> , Cl <sup>-</sup> , SO <sub>4</sub> <sup>2-</sup> , F <sup>-</sup> , NO <sub>3</sub> <sup>-</sup> , TDS, Mo, Be, Zn, Se, Cu, As, Hg, Cd, Ba, Cr, Pb, Mn, Ni, Co, I, Ag <sup>+</sup> , TI, Sb, S <sub>2</sub> <sup>-</sup> , Volatile phenols, Cyanide, NH <sub>4</sub> <sup>+</sup> , NO <sub>2</sub> <sup>-</sup> , COD <sub>Mn</sub> , free carbon dioxide, Chroma, Turbidity, pH, Total hardness, Total alkalinity, Total acidity, Smell and taste |
| Perfluorochemical                     | 15              | PFBA, PFPA, PFBuS, PFHxA, PFHpA, PFHxS, PFOA, PFNA, PFOS, PFDA, PFUnA, PFDS, PFDoDA, PFTrA, PFTeA                                                                                                                                                                                                                                                                                                                                                                                                                                                                                                                   |
| Pesticide                             | 12              | Trichlorophenol, 2,4-Dichlorophenoxyacetic acid, PCP, Parathion, atrazine, Carbaryl, DDVP, Dimethoate, Systox, Darathion-methyl, Malathion, Dursban                                                                                                                                                                                                                                                                                                                                                                                                                                                                 |
| Polycyclic aromatic hydrocarbon(PAHs) | 16              | Naphthalene, acenaphthylene, Acenaphthene, fluorine, phenanthrene, anthracene, Fluoranthene, Pyrene, Benzo[a]anthracene, Chrysene, Benzo[b]fluoranthene, Benzo[k]fluoranthene, Benzo[a]pyrene, Indeno(1,2,3-cd)pyrene, Dibenzo[a,h]anthracene, Benzo[g,h,i]perylene                                                                                                                                                                                                                                                                                                                                                 |
| Organo-chlorine pesticide (OCPs)      | 15              | P,P'-DDD, P,P'-DDE, O,P'-DDT, P,P'-DDT, Dieidrin, Endosulfan I , Alpha-endosulfan, Endosulfan II , Endrin, Heptachlor, Heptachlor epoxide, Hexachlorobenzene, $\alpha$ -BHC, $\beta$ -BHC, $\delta$ -BHC, Methoxychlor                                                                                                                                                                                                                                                                                                                                                                                              |

|                                      |    |                                                                                                                                                                                                                                                                                                                                                                                                                                                                                                                                                                                                                                                                                                                                                                                                                                                                                           |
|--------------------------------------|----|-------------------------------------------------------------------------------------------------------------------------------------------------------------------------------------------------------------------------------------------------------------------------------------------------------------------------------------------------------------------------------------------------------------------------------------------------------------------------------------------------------------------------------------------------------------------------------------------------------------------------------------------------------------------------------------------------------------------------------------------------------------------------------------------------------------------------------------------------------------------------------------------|
| Volatile organic chemicals<br>(VOCs) | 44 | 1, 1-dichloroethane, Bromochloromethane, 1,1, 1-trichloroethane, 1, 2-dichloropropane, Dibromomethane, Bromodichloromethane, Cis-1, 3-dichloropropene, Trans -1, 3-dichloropropene, 1,1, 2-trichloroethane, 1, 3-dichloropropane, Chlorodibromomethane, 1, 2-dibromoethane, 1,1,1, 2-tetrachloroethane, Bromobenzene, 1,2, 3-trichloropropane, Propylbenzene, bromobenzene, 2 - chloro toluene, 4-chlorine toluene, 1,3, 5-trimethylbenzene, 1,2, 4-trimethylbenzene, Sec-butyl benzene, 1,3-dichlorobenzene, N-butylbenzene, 1, 2-dibromo-3-chloropropane, 1,2,4-trichlorobenzene, 1, 1-dichloroethylene, Dichloromethane, Tra-1, 2-dichloroethylene, Cis-1, 2-dichloroethylene, Chloroform, Carbon tetrachloride, Benzene, 1, 2-dichloroethane, Trichloro ethylene, Methylbenzene, Tetrachloroethylene, Chlorobenzol, Ethylbenzene, Styrene, 1, 4-dichlorobenzene, 1, 2-dichlorobenzene |
|--------------------------------------|----|-------------------------------------------------------------------------------------------------------------------------------------------------------------------------------------------------------------------------------------------------------------------------------------------------------------------------------------------------------------------------------------------------------------------------------------------------------------------------------------------------------------------------------------------------------------------------------------------------------------------------------------------------------------------------------------------------------------------------------------------------------------------------------------------------------------------------------------------------------------------------------------------|

**Table S3.** Classification of pollutants used for evaluation.

| Type      | Pollutants                                                                                                                                                                                                                                                                                                                                                                  | Number |
|-----------|-----------------------------------------------------------------------------------------------------------------------------------------------------------------------------------------------------------------------------------------------------------------------------------------------------------------------------------------------------------------------------|--------|
| Natural   | Na <sup>+</sup> , Al, Fe, Cl <sup>-</sup> , SO <sub>4</sub> <sup>2-</sup> , F <sup>-</sup> , NO <sub>3</sub> <sup>-</sup> , TDS, Mo, Be, Zn, Se, Cu, As, Cd, Ba, Cr, Pb, Mn, Ni, Co, I <sup>-</sup> , Ag <sup>+</sup> , TI, Sb, Volatile Phenols, NO <sub>2</sub> <sup>-</sup> , COD <sub>Mn</sub> , Total hardness, Anthracene, Naphthalene, Fluoranthene                  | 32     |
| Unnatural | Trichlorophenol, 2,4-Dichlorophenoxyacetic acid, Pentachlorophenol, atrazine, Parathion-methyl, Hexachlorobenzene, 1,1,1-Trichloroethane, 1,2,4-Trichlorobenzene, 1,1-Dichloroethylene, 1, 2-Dichloroethylene, Carbon tetrachloride, Methylbenzene, Tetrachloroethylene, Ethylbenzene, 1, 4 – Dichlorobenzene, 1, 2 – Dichlorobenzene, Benzo[a]pyrene, Benzo[b]fluoranthene | 18     |

**Table S4.** The detection limits of unnatural components.

| Component                      | Detection Limit<br>(µg/L) | Component            | Detection Limit<br>(µg/L) |
|--------------------------------|---------------------------|----------------------|---------------------------|
| Trichlorophenol                | 0.03                      | 1,2-Dichloroethylene | 0.03                      |
| 2,4-Dichlorophenoxyacetic acid | 0.03                      | Carbon tetrachloride | 0.3                       |
| Pentachlorophenol              | 0.03                      | Methylbenzene        | 0.3                       |
| Atrazine                       | 0.0015                    | Tetrachloroethylene  | 0.001                     |
| parathion-methyl               | 0.06                      | Ethylbenzene         | 0.3                       |
| Hexachlorobenzene              | 0.5                       | 1,4-Dichlorobenzene  | 0.003                     |
| 1,1,1-Trichloroethane          | 0.004                     | 1,2-Dichlorobenzene  | 0.011                     |
| 1,2,4-Trichlorobenzene         | 0.002                     | Benzo (a) pyrene     | 0.002                     |
| 1,1-Dichloroethylene           | 0.02                      | Benzo[b]fluoranthene | 0.002                     |

**Table S5.** Weight assignment scheme.

| Assignment Scheme | $W_Q$ | $W_M$ | $W_C$ |
|-------------------|-------|-------|-------|
| a                 | 0.33  | 0.33  | 0.33  |
| b                 | 0.25  | 0.25  | 0.5   |
| c                 | 0.2   | 0.2   | 0.6   |
| d                 | 0.25  | 0.5   | 0.25  |
| e                 | 0.5   | 0.25  | 0.25  |

$W_Q$  represent the weight of total pollution degree  $Q$ ,  $W_M$  represent the weight of median pollution degree  $M$ , and  $W_C$  represent the weight of toxicity  $C$ .

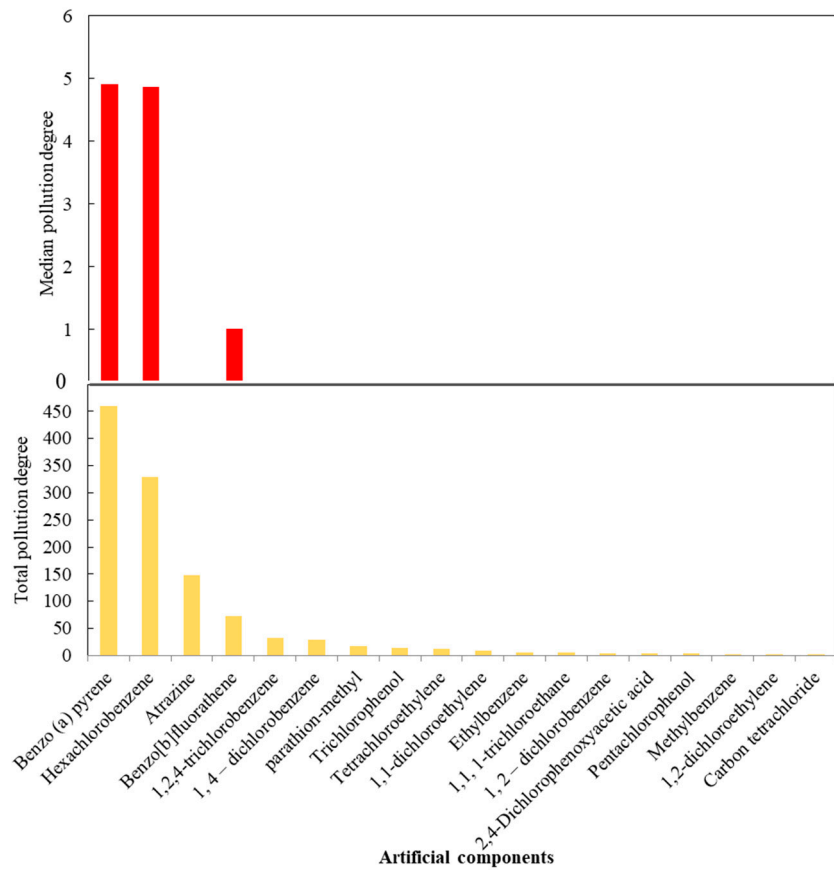

**Figure S1.** The pollution degree of unnatural components.

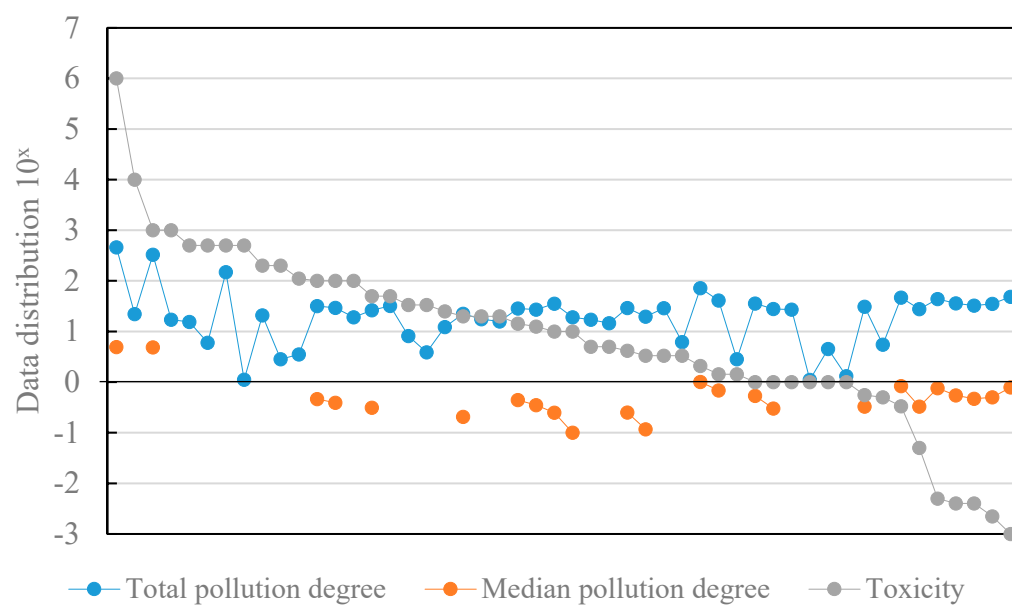

**Figure S2.** The data distribution in the study.
